# Supplementary material for: Biocontrol Capabilities of Bacillus subtilis E11 against Aspergillus flavus In Vitro and for Dried Red Chili (Capsicum annuum L.)
Source: MDPI journal article supplement (doi:10.3390/toxins15050308), 2023-04-26
Supplement: s1 [file s1]

**Table S1.** Preliminary screening of bacteria against *A. flavus*

| Strain | Identification                    | Antagonistic ability |
|--------|-----------------------------------|----------------------|
| 2-1    | <i>Lactobacillus plantarum</i>    | -                    |
| 3-2    | <i>Lactobacillus alimentarius</i> | -                    |
| 5-1    | <i>Lactobacillus plantarum</i>    | -                    |
| 5-4    | <i>Lactobacillus hilgardii</i>    | -                    |
| 7-2    | <i>Lactobacillus pentosus</i>     | -                    |
| 7-4    | <i>Lactobacillus alimentarius</i> | -                    |
| 8-1    | <i>Lactobacillus plantarum</i>    | -                    |
| 9-1    | <i>Lactobacillus namurensis</i>   | -                    |
| 9-3    | <i>Lactobacillus paracasei</i>    | -                    |
| 10-1   | <i>Lactobacillus alimentarius</i> | -                    |
| 13-4   | <i>Lactobacillus alimentarius</i> | -                    |
| 16-1   | <i>Lactobacillus plantarum</i>    | -                    |
| 16-4   | <i>Lactobacillus pentosus</i>     | -                    |
| 17-1   | <i>Weissella hellenica</i>        | -                    |
| 19-1   | <i>Lactobacillus pentosus</i>     | -                    |
| 19-2   | <i>Lactobacillus alimentarius</i> | -                    |
| 21-1   | <i>Lactobacillus plantarum</i>    | -                    |
| 21-3   | <i>Lactobacillus pentosus</i>     | -                    |
| 21-4   | <i>Lactobacillus harbinensis</i>  | -                    |
| 21-5   | <i>Pediococcus ethanolidurans</i> | -                    |

---

|             |                                   |   |
|-------------|-----------------------------------|---|
| 24-1        | <i>Lactobacillus plantarum</i>    | - |
| 25-1        | <i>Lactobacillus alimentarius</i> | - |
| 28-1        | <i>Lactobacillus alimentarius</i> | - |
| 29-1        | <i>Lactobacillus alimentarius</i> | - |
| 33-3        | <i>Lactobacillus plantarum</i>    | - |
| CICC6239    | <i>Lactobacillus brevis</i>       | - |
| CICC24450   | <i>Lactobacillus brevis</i>       | - |
| CGMCC1.2427 | <i>Lactobacillus fructivorans</i> | - |
| 4           |                                   | - |
| E11         |                                   | + |
| V1J         |                                   | + |
| V2          |                                   | + |
| J0          |                                   | - |
| J1          |                                   | - |
| Y1①         | <i>Bacillus subtilis</i>          | - |
| D2④         |                                   | - |
| V1J2        |                                   | + |
| V2②         |                                   | - |
| VIJ1        |                                   | + |
| 2×1         |                                   | + |
| 2399        |                                   | - |

---

---

|        |   |
|--------|---|
| Fy1q   | - |
| 67     | - |
| 10081  | - |
| y×10②  | - |
| y×10②' | - |
| GQy8   | - |
| 1#     | + |
| H6     | + |
| B1⑥    | - |
| Y1③    | - |
| VIJ3   | - |
| C1②    | - |
| 10063  | + |
| H1     | - |
| 9932   | + |
| B1-3   | - |
| Z4-5   | - |
| BJ3-2  | - |
| KCCK   | - |
| KCFZ   | - |
| KCW    | - |

---

---

|     |   |
|-----|---|
| KCB | - |
|-----|---|

---

(Note: “+” denoted the strain had obvious bacteriostasis circle, “-” denoted the strain didn’t have obvious bacteriostasis circle)

**Table S2.** The abilities of *B. subtilis* E11, *B. subtilis* V1J1, and *B. subtilis* 9932 to degrade AFB<sub>1</sub> at different time points.

| Strains                 | Time (h)     |              |              |              |              |
|-------------------------|--------------|--------------|--------------|--------------|--------------|
|                         | 24           | 48           | 72           | 96           | 120          |
| <i>B. subtilis</i> E11  | 81.34 ±3.25% | 88.86 ±1.92% | 92.85 ±0.48% | 95.38 ±0.69% | 96.28 ±0.62% |
| <i>B. subtilis</i> 9932 | 82.72 ±4.95% | 86.89 ±0.57% | 88.68 ±1.62% | 89.31 ±0.41% | 95.17 ±0.41% |
| <i>B. subtilis</i> V1J1 | 84.09 ±4.36% | 89.03 ±1.00% | 90.81 ±2.06% | 94.73 ±1.00% | 95.58 ±0.71% |

The values were reported as average ± SD and were the mean of three independent analyses.

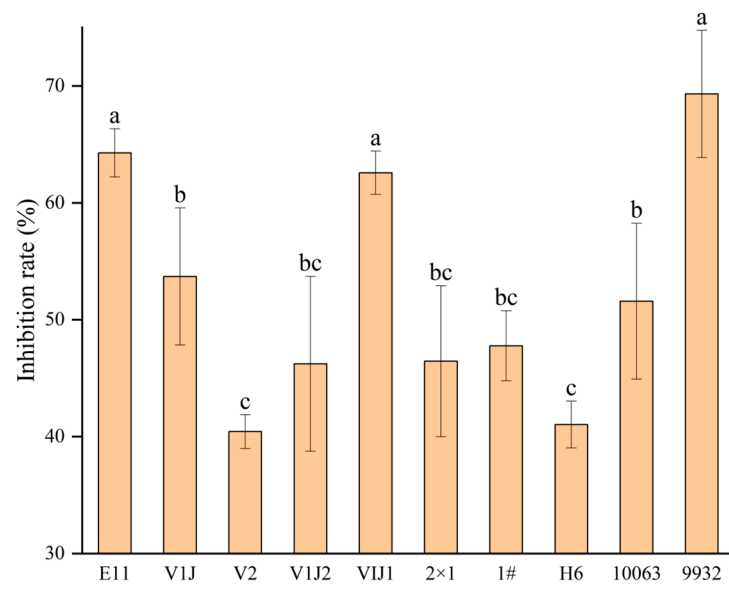

**Figure S1.** Rescreening of antagonistic bacteria against *A. flavus*. Values were expressed as means  $\pm$  SD;

a, b, c indicated significant differences of inhibition rate of different strains to *A. flavus* ( $p < 0.05$ ).

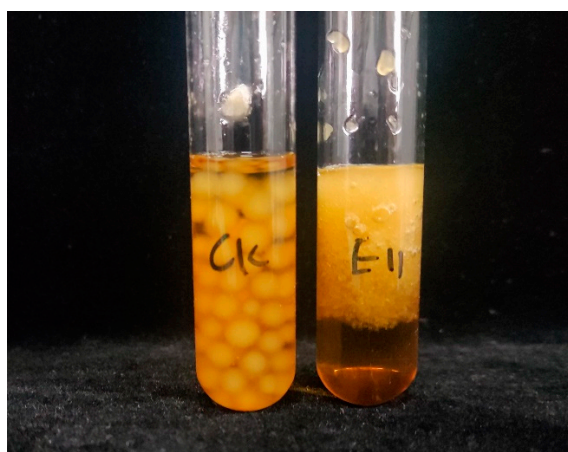

**Figure S2.** The effect of the fermentation supernatant of *B. subtilis* E11 on *A. flavus* mycelia. The tube on the left was the morphology of *A. flavus* mycelia after 72h culture without the fermentation supernatant of *B. subtilis* E11; The tube on the right showed the mycelia morphology of *A. flavus* co-cultured with *B. subtilis* E11 fermentation supernatant after 72h.
